# Supplementary material
Source: PubMed Central journal article supplement (PMC2629399)

**FIGURE S1. p53 mutants show developmental changes in *ban* sensor levels**

Wing imaginal discs from wild type (20.X) and p53 (p53; 20.X) larvae that are carrying the tubulin-EGFP *ban* reporter are dissected from larvae at early 3<sup>rd</sup> instar (A,D), late feeding 3<sup>rd</sup> instar (B,E) and wandering 3<sup>rd</sup> instar (C,F) stages and imaged for EGFP. Images have been acquired and processed identically to allow for direct comparison of fluorescence intensity.

**FIGURE S2. EGFP mRNA levels show no consistent change after irradiation**

(A) Total RNA was extracted from whole wild type (*Sev*; negative control for EGFP) or *hid* 3'UTR sensor bearing larvae (*hid* sensor) and Northern blotted for EGFP mRNA. EGFP signal is absent in '*Sev*' indicating the specificity of the probe. 'ns' = non-specific band. '*hid* sensor' larvae had been exposed to 0 (-) or 4000 R (+) of X-rays and allowed to rest for indicated times before RNA extraction. 5S RNA signal was used to normalize for unequal loading. (B) EGFP signal was quantified, corrected for loading, and normalized to '-IR' samples for each time-point. Average of two independent experiments are shown. We do not see a consistent change in EGFP following irradiation.

Jaklevic et al. Figure S1

**20.X**

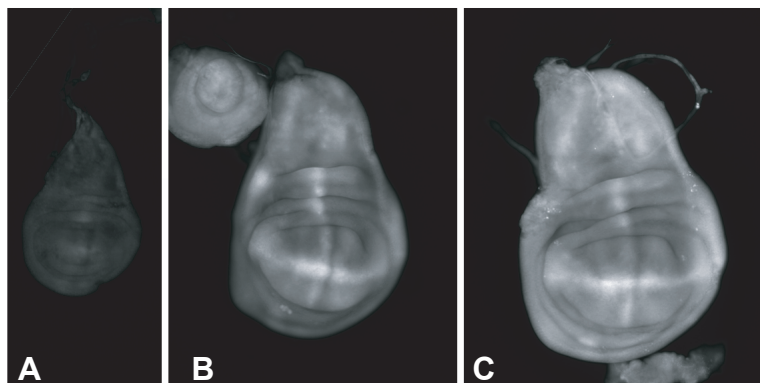

**20.X; p53**

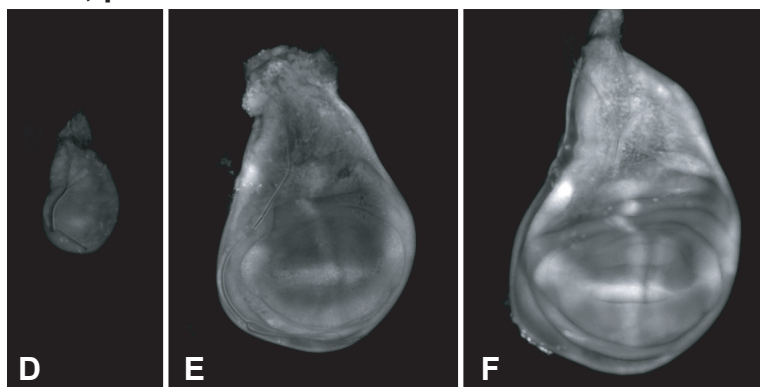

Supplement: NIHMS64680-supplement-01.pdf [file NIHMS64680-supplement-01.pdf]
